# Supplementary material for: Genome-wide identification of bHLH gene family and its response to cadmium stress in Populus × canescens
Source: PeerJ journal article supplement (doi:10.7717/peerj.17410), 2024-05-27
Supplement: miqe_checklist.xls [file miqe_checklist.xls]

## Sheet: Sheet1
ITEM TO CHECK	IMPORTANCE	CHECKLIST	Location
EXPERIMENTAL DESIGN			The experimental design is presented in the lines 174 to 181 on page 6 and 7 of text
Definition of experimental and control groups	E	Experimental groups: the sample under Cd treatment. Control groups: the samples without Cd treatment	The experimental design is presented in the lines 174 to 181 on page 6 and 7 of text
Number within each group	E	3 with each group	The experimental design is presented in the lines 174 to 181 on page 6 and 7 of text
Assay carried out by core lab or investigator's lab?	D
Acknowledgement of authors' contributions	D
SAMPLE			The sample is presented in the lines 174 to 181 on page 6 and 7 of text
Description	E	the leaf, stem and root of Populus canescens	The sample is presented in the lines 174 to 181 on page 6 and 7 of text
Volume/mass of sample processed	D
Microdissection or macrodissection	E	macrodissection	The sample is presented in the lines 174 to 181 on page 6 and 7 of text
Processing procedure	E	no	The sample is presented in the lines 174 to 181 on page 6 and 7 of text
If frozen - how and how quickly?	E	Freeze liquid nitrogen immediately	The sample is presented in the lines 174 to 181 on page 6 and 7 of text
If fixed - with what, how quickly?	E	no	The sample is presented in the lines 174 to 181 on page 6 and 7 of text
Sample storage conditions and duration (especially for FFPE samples)	E	Keep at -80 ° C for a week	The sample is presented in the lines 174 to 181 on page 6 and 7 of text
NUCLEIC ACID EXTRACTION			The nuclelc acid extraction is presented in the specification in line 184 on page 7 of the text
Procedure and/or instrumentation	E	Total RNA of P. canescens seedlings was extracted from root, stem, and leaf samples. 1. Homogenization: 50-100 mg of plant leaves or fruit pulp is quickly ground into powder in liquid nitrogen, and 500ul of lysate SL is added (please check whether β-thio ethanol has been added before use), and immediately swirl violently and mix. 2. Centrifuge at 12,000 rpm(~13,400×g) for 2 min. 3. The supernatan…	The nuclelc acid extraction is presented in the specification in line 184 on page 7 of the text
Name of kit and details of any modifications	E	RNAprep Pure Plant Plus Kit (TIANGEN, Beijing, China)	The nuclelc acid extraction is presented in the specification in line 184 on page 7 of the text
Source of additional reagents used	D
Details of DNase or RNAse treatment	E	Add 80 ul of DNasel working liquid to the center of adsorption column CR3 and leave it at room temperature for 15 min	The nuclelc acid extraction is presented in the specification in line 184 on page 7 of the text
Contamination assessment (DNA or RNA)	E	Reverse transcription controls (without enzyme) were performed in order to assess theexistence of DNA in the RNA sample. For that purpose, RNA was processed as a normalsample in the RT step, except that no reverse transcriptase was added to the reactionmixture.	The nuclelc acid extraction is presented in the specification in line 184 on page 7 of the text
Nucleic acid quantification	E	RNA concentration was assessed using spectrophotometry by measuring theabsorbance at 260 nm UV light.	The nuclelc acid extraction is presented in the specification in line 184 on page 7 of the text
Instrument and method	E	Spectrophotometry (Eppendorf)	The nuclelc acid extraction is presented in the specification in line 184 on page 7 of the text
Purity (A260/A280)	D
Yield	D
RNA integrity method/instrument	E	RNA electrophoresis	The nuclelc acid extraction is presented in the specification in line 184 on page 7 of the text
RIN/RQI or Cq of 3' and 5' transcripts	E	no	The nuclelc acid extraction is presented in the specification in line 184 on page 7 of the text
Electrophoresis traces	D
Inhibition testing (Cq dilutions, spike or other)	E	no	The nuclelc acid extraction is presented in the specification in line 184 on page 7 of the text
REVERSE TRANSCRIPTION			The reverse transcription is presented in the specification in line 185 on page 7 of the text
Complete reaction conditions	E	1ug total RNA and 2ul 5×PrimeScript RT Master Mix add ddH2O to 10ul. Gently mixed for reverse transcription reaction: 37° 15min, 85° 5sec, 4° forever	The reverse transcription is presented in the specification in line 185 on page 7 of the text
Amount of RNA and reaction volume	E	RNA:1ug. Volume: 10ul	The reverse transcription is presented in the specification in line 185 on page 7 of the text
Priming oligonucleotide (if using GSP) and concentration	E	oligo dTprimer: 50pmol/20ul reaction system	The reverse transcription is presented in the specification in line 185 on page 7 of the text
Reverse transcriptase and concentration	E	PrimeScript RT Master Mix	The reverse transcription is presented in the specification in line 185 on page 7 of the text
Temperature and time	E	37° 15min, 85° 5sec, 4° forever	The reverse transcription is presented in the specification in line 185 on page 7 of the text
Manufacturer of reagents and catalogue numbers	D	PrimeScript™ RT Master Mix (Perfect Real Time)(RR036Q)	The reverse transcription is presented in the specification in line 185 on page 7 of the text
Cqs with and without RT	D*
Storage conditions of cDNA	D	-20°
qPCR TARGET INFORMATION			The qPCR target information is presented in the Table s4
If multiplex, efficiency and LOD of each assay.	E	no	The qPCR target information is presented in the Table s4
Sequence accession number	E	Table s4 in supporting information	The qPCR target information is presented in the Table s4
Location of amplicon	D
Amplicon length	E	Table s4 in supporting information	The qPCR target information is presented in the Table s4
In silico specificity screen (BLAST, etc)	E	Tbtools primer check	The qPCR target information is presented in the Table s4
Pseudogenes, retropseudogenes or other homologs?	D
Sequence alignment	D
Secondary structure analysis of amplicon	D
Location of each primer by exon or intron (if applicable)	E	exon
What splice variants are targeted?	E	no
qPCR OLIGONUCLEOTIDES			The qPCR target information is presented in the Table s4
Primer sequences	E	Table s4 in supporting information	The qPCR target information is presented in the Table s4
RTPrimerDB Identification Number	D
Probe sequences	D**
Location and identity of any modifications	E	no	The qPCR target information is presented in the Table s4
Manufacturer of oligonucleotides	D
Purification method	D
qPCR PROTOCOL			The qPCR protocol is presented in the specification in line 186 to 187 on page 7 of the text
Complete reaction conditions	E	A total of 10ul of the reaction volume was used for qPCR. 1ul of cDNA, 0.3ul of each primer, 3.4ul of ddH2O and 5ul 2 × Q3 SYBR qPCR Master Mix. All qPCR reaction were performed on ABI 7300 Real-Time PCR System(Applied Biosystems, CA, United States), using the following condition: 95°for 30s, followed by 40 cycle at 95°for 10s and 60°for 30s.	The qPCR protocol is presented in the specification in line 186 to 187 on page 7 of the text
Reaction volume and amount of cDNA/DNA	E	Reaction volum 10ul. Amount of cDNA :1ul.	The qPCR protocol is presented in the specification in line 186 to 187 on page 7 of the text
Primer, (probe), Mg++ and dNTP concentrations	E	0.4uM primer	The qPCR protocol is presented in the specification in line 186 to 187 on page 7 of the text
Polymerase identity and concentration	E	2 × Q3 SYBR qPCR Master Mix	The qPCR protocol is presented in the specification in line 186 to 187 on page 7 of the text
Buffer/kit identity and manufacturer	E	TOLOBIO	The qPCR protocol is presented in the specification in line 186 to 187 on page 7 of the text
Exact chemical constitution of the buffer	D
Additives (SYBR Green I, DMSO, etc.)	E	no	The qPCR protocol is presented in the specification in line 186 to 187 on page 7 of the text
Manufacturer of plates/tubes and catalog number	D
Complete thermocycling parameters	E	95°for 30s, followed by 40 cycle at 95°for 10s and 60°for 30s.	The qPCR protocol is presented in the specification in line 186 to 187 on page 7 of the text
Reaction setup (manual/robotic)	D
Manufacturer of qPCR instrument	E	ABI 7300 Real-Time PCR System(Applied Biosystems, CA, United States)	The qPCR protocol is presented in the specification in line 186 to 187 on page 7 of the text
qPCR VALIDATION			no location
Evidence of optimisation (from gradients)	D
Specificity (gel, sequence, melt, or digest)	E	Specificity was confirmed by melt curve analyses and sequencing analysis	no location
For SYBR Green I, Cq of the NTC	E	We did not set NTC	no location
Standard curves with slope and y-intercept	E	We used the ct comparison method rather than the standard curve method	no location
PCR efficiency calculated from slope	E	We used the ct comparison method rather than the standard curve method	no location
Confidence interval for PCR efficiency or standard error	D
r2 of standard curve	E	We used the ct comparison method rather than the standard curve method	no location
Linear dynamic range	E	We used the ct comparison method rather than the standard curve method	no location
Cq variation at lower limit	E	We used the ct comparison method rather than the standard curve method	no location
Confidence intervals throughout range	D
Evidence for limit of detection	E	As the CT higher than 35 was considered not detected	no location
If multiplex, efficiency and LOD of each assay.	E	no multiplex
DATA ANALYSIS			The data analysis locates lines 187 to 188 on page 7 of the text
qPCR analysis program (source, version)	E	Quantification Software version 2.1(Applied Biosystems, UsA)	The data analysis locates lines 187 to 188 on page 7 of the text
Cq method determination	E	The threshold was defined as the fractional cydle number at which the fluorescenceexceeded the given threshold and was calculated using SDS Relative QuantificationSoftware version 2.1 using the automatic baseline setting.	The data analysis locates lines 187 to 188 on page 7 of the text
Outlier identification and disposition	E	Delete	The data analysis locates lines 187 to 188 on page 7 of the text
Results of NTCs	E	We did not set NTC	The data analysis locates lines 187 to 188 on page 7 of the text
Justification of number and choice of reference genes	E	Reference	The data analysis locates lines 187 to 188 on page 7 of the text
Description of normalisation method	E	2-ΔΔCT=[(CT gene of interest - CT internal control)sample A - (CT gene of interest - CT internal control)sample B]	The data analysis locates lines 187 to 188 on page 7 of the text
Number and concordance of biological replicates	D
Number and stage (RT or qPCR) of technical replicates	E	3	The data analysis locates lines 187 to 188 on page 7 of the text
Repeatability (intra-assay variation)	E	Mean standard deviation of triplicates: less than 0.10.	The data analysis locates lines 187 to 188 on page 7 of the text
Reproducibility (inter-assay variation, %CV)	D
Power analysis	D
Statistical methods for result significance	E	Anova	The data analysis locates lines 187 to 188 on page 7 of the text
Software (source, version)	E	Rstudio4.2.1	The data analysis locates lines 187 to 188 on page 7 of the text
Cq or raw data submission using RDML	D
Table 1. MIQE checklist for authors, reviewers and editors. All essential information (E) must be submitted with the manuscript. Desirable
information (D) should be submitted if available. If using primers obtained from RTPrimerDB, information on qPCR target, oligonucleotides,
protocols and validation is available from that source.
RDNA-free, inclusion of a no-RT control is desirable, but no longer essential.
**: Disclosure of the probe sequence is highly desirable and strongly encouraged. However, since not all commercial pre-designed assay
vendors provide this information, it cannot be an essential requirement. Use of such assays is advised against.
