# Supplementary material for: Genome-wide identification of bHLH gene family and its response to cadmium stress in Populus × canescens
Source: PeerJ journal article supplement (doi:10.7717/peerj.17410), 2024-05-27
Supplement: TableS1and2and3.xls [file TableS1and2and3.xls]

## Sheet: TableS1
The genes rename and gene IDs of Populus canescens and Arabidopsis thaliana
Species	Sequence Name	Gene ID
Populus canescens	PcbHLH1	Potri.001G062900.1
	PcbHLH2	Potri.001G063000.1
	PcbHLH3	Potri.001G083500.1
	PcbHLH4	Potri.001G103600.1
	PcbHLH5	Potri.001G113400.1
	PcbHLH6	Potri.001G142200.1
	PcbHLH7	Potri.001G191800.1
	PcbHLH8	Potri.001G287200.1
	PcbHLH9	Potri.001G294300.1
	PcbHLH10	Potri.001G305100.1
	PcbHLH11	Potri.001G314400.1
	PcbHLH12	Potri.001G410600.1
	PcbHLH13	Potri.001G416600.1
	PcbHLH14	Potri.001G461000.1
	PcbHLH15	Potri.002G042000.1
	PcbHLH16	Potri.002G045400.1
	PcbHLH17	Potri.002G054100.1
	PcbHLH18	Potri.002G055400.1
	PcbHLH19	Potri.002G101900.1
	PcbHLH20	Potri.002G108400.1
	PcbHLH21	Potri.002G114700.1
	PcbHLH22	Potri.002G119200.1
	PcbHLH23	Potri.002G124400.1
	PcbHLH24	Potri.002G125000.1
	PcbHLH25	Potri.002G143300.1
	PcbHLH26	Potri.002G172100.1
	PcbHLH27	Potri.002G176900.1
	PcbHLH28	Potri.002G180300.3
	PcbHLH29	Potri.002G235400.1
	PcbHLH30	Potri.002G248500.1
	PcbHLH31	Potri.002G252800.8
	PcbHLH32	Potri.003G074400.1
	PcbHLH33	Potri.003G092200.1
	PcbHLH34	Potri.003G128000.1
	PcbHLH35	Potri.003G147300.1
	PcbHLH36	Potri.004G029100.1
	PcbHLH37	Potri.004G031800.1
	PcbHLH38	Potri.004G044400.1
	PcbHLH39	Potri.004G055700.1
	PcbHLH40	Potri.004G088900.1
	PcbHLH41	Potri.004G099400.1
	PcbHLH42	Potri.004G112900.1
	PcbHLH43	Potri.004G128400.1
	PcbHLH44	Potri.004G156000.5
	PcbHLH45	Potri.004G168100.1
	PcbHLH46	Potri.005G001800.1
	PcbHLH47	Potri.005G039800.1
	PcbHLH48	Potri.005G053500.1
	PcbHLH49	Potri.005G060900.1
	PcbHLH50	Potri.005G071100.1
	PcbHLH51	Potri.005G095400.1
	PcbHLH52	Potri.005G113400.1
	PcbHLH53	Potri.005G138900.1
	PcbHLH54	Potri.005G139700.1
	PcbHLH55	Potri.005G146500.1
	PcbHLH56	Potri.005G207200.1
	PcbHLH57	Potri.005G208600.1
	PcbHLH58	Potri.005G217800.1
	PcbHLH59	Potri.005G221100.1
	PcbHLH60	Potri.006G037100.1
	PcbHLH61	Potri.006G037200.1
	PcbHLH62	Potri.006G037600.1
	PcbHLH63	Potri.006G057200.2
	PcbHLH64	Potri.006G057600.1
	PcbHLH65	Potri.006G074600.1
	PcbHLH66	Potri.006G074700.1
	PcbHLH67	Potri.006G074800.1
	PcbHLH68	Potri.006G074900.1
	PcbHLH69	Potri.006G102600.1
	PcbHLH70	Potri.006G135600.1
	PcbHLH71	Potri.006G148800.1
	PcbHLH72	Potri.006G186600.1
	PcbHLH73	Potri.006G202100.1
	PcbHLH74	Potri.007G009400.1
	PcbHLH75	Potri.007G010500.1
	PcbHLH76	Potri.007G023600.1
	PcbHLH96	Potri.007G097600.1
	PcbHLH77	Potri.008G052000.1
	PcbHLH78	Potri.008G070800.1
	PcbHLH79	Potri.008G112000.2
	PcbHLH80	Potri.008G113200.1
	PcbHLH81	Potri.008G116000.1
	PcbHLH82	Potri.008G161800.2
	PcbHLH83	Potri.008G165700.1
	PcbHLH84	Potri.008G189600.1
	PcbHLH85	Potri.008G190800.1
	PcbHLH86	Potri.008G202900.1
	PcbHLH87	Potri.009G005600.1
	PcbHLH88	Potri.009G023800.1
	PcbHLH89	Potri.009G064700.1
	PcbHLH90	Potri.009G081400.1
	PcbHLH91	Potri.009G089000.1
	PcbHLH92	Potri.009G117300.1
	PcbHLH93	Potri.009G129600.1
	PcbHLH94	Potri.009G136300.1
	PcbHLH95	Potri.010G040000.1
	PcbHLH97	Potri.010G072900.1
	PcbHLH98	Potri.010G077000.1
	PcbHLH99	Potri.010G130000.1
	PcbHLH100	Potri.010G136100.1
	PcbHLH101	Potri.010G137600.1
	PcbHLH102	Potri.010G186700.1
	PcbHLH103	Potri.011G031000.1
	PcbHLH104	Potri.011G033000.1
	PcbHLH105	Potri.011G053400.1
	PcbHLH106	Potri.011G065500.1
	PcbHLH107	Potri.011G080000.1
	PcbHLH108	Potri.011G129500.1
	PcbHLH109	Potri.011G132400.1
	PcbHLH110	Potri.011G157700.1
	PcbHLH111	Potri.012G031800.1
	PcbHLH112	Potri.012G055700.1
	PcbHLH113	Potri.012G065000.1
	PcbHLH114	Potri.012G069500.1
	PcbHLH115	Potri.012G072700.1
	PcbHLH116	Potri.012G079100.1
	PcbHLH117	Potri.012G104900.1
	PcbHLH118	Potri.012G106000.1
	PcbHLH119	Potri.012G132000.1
	PcbHLH120	Potri.012G132100.1
	PcbHLH121	Potri.013G001300.1
	PcbHLH122	Potri.013G025900.1
	PcbHLH123	Potri.013G041000.3
	PcbHLH124	Potri.013G107500.1
	PcbHLH125	Potri.013G117600.1
	PcbHLH162	Potri.013G129800.1
	PcbHLH126	Potri.014G017100.1
	PcbHLH127	Potri.014G025800.1
	PcbHLH128	Potri.014G027300.1
	PcbHLH129	Potri.014G066500.1
	PcbHLH130	Potri.014G099700.1
	PcbHLH131	Potri.014G103700.1
	PcbHLH132	Potri.014G106300.1
	PcbHLH133	Potri.014G111400.1
	PcbHLH134	Potri.014G148900.1
	PcbHLH135	Potri.014G150600.1
	PcbHLH136	Potri.015G022300.1
	PcbHLH137	Potri.015G046300.1
	PcbHLH138	Potri.015G048000.1
	PcbHLH139	Potri.015G063300.1
	PcbHLH140	Potri.015G068100.1
	PcbHLH141	Potri.015G074500.1
	PcbHLH142	Potri.015G104200.1
	PcbHLH143	Potri.015G105200.1
	PcbHLH144	Potri.015G134300.1
	PcbHLH145	Potri.015G134400.1
	PcbHLH146	Potri.015G142700.1
	PcbHLH147	Potri.016G035400.1
	PcbHLH148	Potri.016G037300.1
	PcbHLH149	Potri.016G050500.1
	PcbHLH150	Potri.016G051100.1
	PcbHLH151	Potri.016G068500.1
	PcbHLH152	Potri.016G120800.1
	PcbHLH153	Potri.017G054500.1
	PcbHLH154	Potri.017G081300.1
	PcbHLH155	Potri.017G101700.1
	PcbHLH156	Potri.017G115300.1
	PcbHLH157	Potri.017G126800.1
	PcbHLH158	Potri.018G109500.1
	PcbHLH159	Potri.018G141500.1
	PcbHLH160	Potri.018G141600.1
	PcbHLH161	Potri.018G141700.1
	PcbHLH163	Potri.018G141800.1
	PcbHLH164	Potri.019G034700.1
	PcbHLH165	Potri.019G079900.2
	PcbHLH166	Potri.019G089000.1
	PcbHLH167	Potri.019G099300.1
	PcbHLH168	Potri.019G099400.1
	PcbHLH169	Potri.019G099500.1
	PcbHLH170	Potri.T155900.1
Arabidopsis thaliana	AtbHLH1	>AT5G41315.1
	AtbHLH2	>AT1G63650.1
	AtbHLH3	>AT4G16430.1
	AtbHLH4	>AT4G17880.1
	AtbHLH5	>AT5G46760.1
	AtbHLH6	>AT1G32640.1
	AtbHLH7	>AT1G03040.1
	AtbHLH8	>AT1G09530.1
	AtbHLH9	>AT2G43010.1
	AtbHLH10	>AT2G31220.1
	AtbHLH11	>AT4G36060.1
	AtbHLH12	>AT4G00480.2
	AtbHLH14	>AT4G00870.1
	AtbHLH15	>AT2G20180.2
	AtbHLH16	>AT4G00050.1
	AtbHLH17	>AT2G46510.1
	AtbHLH18	>AT2G22750.2
	AtbHLH19	>AT2G22760.1
	AtbHLH20	>AT2G22770.1
	AtbHLH21	>AT2G16910.1
	AtbHLH22	>AT4G21330.1
	AtbHLH23	>AT4G28790.1
	AtbHLH24	>AT4G36930.1
	AtbHLH25	>AT4G37850.1
	AtbHLH26	>AT1G02340.1
	AtbHLH27	>AT4G29930.3
	AtbHLH28	>AT5G46830.1
	AtbHLH29	>AT2G28160.1
	AtbHLH30	>AT1G68810.1
	AtbHLH31	>AT1G59640.2
	AtbHLH32	>AT3G25710.1
	AtbHLH33	>AT1G12860.1
	AtbHLH34	>AT3G23210.1
	AtbHLH35	>AT5G57150.4
	AtbHLH36	>AT5G51780.1
	AtbHLH37	>AT3G50330.1
	AtbHLH38	>AT3G56970.1
	AtbHLH39	>AT3G56980.1
	AtbHLH40	>AT4G00120.1
	AtbHLH41	>AT5G56960.1
	AtbHLH42	>AT4G09820.1
	AtbHLH43	>AT5G09750.1
	AtbHLH44	>AT1G18400.1
	AtbHLH45	>AT3G06120.1
	AtbHLH46	>AT5G08130.5
	AtbHLH47	>AT3G47640.1
	AtbHLH48	>AT2G42300.1
	AtbHLH49	>AT1G68920.1
	AtbHLH50	>AT1G73830.1
	AtbHLH51	>AT2G40200.1
	AtbHLH52	>AT1G30670.1
	AtbHLH53	>AT2G34820.1
	AtbHLH54	>AT1G27740.1
	AtbHLH55	>AT1G12540.1
	AtbHLH56	>AT4G28800.1
	AtbHLH57	>AT4G01460.1
	AtbHLH58	>AT4G36540.1
	AtbHLH59	>AT4G02590.1
	AtbHLH60	>AT3G57800.1
	AtbHLH61	>AT5G10570.1
	AtbHLH62	>AT3G07340.1
	AtbHLH63	>AT4G34530.1
	AtbHLH64	>AT2G18300.3
	AtbHLH65	>AT3G59060.2
	AtbHLH66	>AT2G24260.1
	AtbHLH67	>AT3G61950.1
	AtbHLH68	>AT4G29100.1
	AtbHLH69	>AT4G30980.1
	AtbHLH70	>AT2G46810.1
	AtbHLH71	>AT5G46690.1
	AtbHLH72	>AT5G61270.1
	AtbHLH73	>AT5G67110.1
	AtbHLH74	>AT1G10120.1
	AtbHLH75	>AT1G25330.1
	AtbHLH76	>AT1G26260.1
	AtbHLH77	>AT3G23690.1
	AtbHLH78	>AT5G48560.1
	AtbHLH79	>AT5G62610.1
	AtbHLH80	>AT1G35460.1
	AtbHLH81	>AT4G09180.1
	AtbHLH82	>AT5G58010.1
	AtbHLH83	>AT1G66470.1
	AtbHLH84	>AT2G14760.3
	AtbHLH85	>AT4G33880.1
	AtbHLH86	>AT5G37800.1
	AtbHLH87	>AT3G21330.1
	AtbHLH88	>AT5G67060.1
	AtbHLH89	>AT1G06170.1
	AtbHLH90	>AT1G10610.1
	AtbHLH91	>AT2G31210.1
	AtbHLH92	>AT5G43650.1
	AtbHLH93	>AT5G65640.1
	AtbHLH94	>AT1G22490.1
	AtbHLH95	>AT1G49770.1
	AtbHLH96	>AT1G72210.1
	AtbHLH97	>AT3G24140.1
	AtbHLH98	>AT5G53210.1
	AtbHLH99	>AT5G65320.1
	AtbHLH100	>AT2G41240.1
	AtbHLH101	>AT5G04150.1
	AtbHLH102	>AT1G69010.1
	AtbHLH103	>AT4G21340.1
	AtbHLH104	>AT4G14410.1
	AtbHLH105	>AT5G54680.1
	AtbHLH106	>AT2G41130.1
	AtbHLH107	>AT3G56770.1
	AtbHLH108	>AT1G25310.1
	AtbHLH109	>AT1G68240.1
	AtbHLH110	>AT1G27660.1
	AtbHLH112	>AT1G61660.1
	AtbHLH113	>AT3G19500.1
	AtbHLH114	>AT4G05170.1
	AtbHLH115	>AT1G51070.2
	AtbHLH116	>AT3G26744.1
	AtbHLH117	>AT3G22100.1
	AtbHLH118	>AT4G25400.1
	AtbHLH119	>AT4G28811.1
	AtbHLH120	>AT5G51790.1
	AtbHLH121	>AT3G19860.2
	AtbHLH122	>AT1G51140.1
	AtbHLH123	>AT3G20640.1
	AtbHLH124	>AT2G46970.1
	AtbHLH125	>AT1G62975.1
	AtbHLH126	>AT4G25410.1
	AtbHLH127	>AT4G28815.1
	AtbHLH128	>AT1G05805.1
	AtbHLH129	>AT2G43140.2
	AtbHLH130	>AT2G42280.1
	AtbHLH131	>AT4G38070.1
	AtbHLH132	>AT3G62090.2
	AtbHLH133	>AT5G15160.1
	AtbHLH134	>AT1G74500.1
	AtbHLH135	>AT5G39860.1
	AtbHLH136	>AT5G50915.1
	AtbHLH137	>AT2G31215.1
	AtbHLH138	>AT5G43175.1
	AtbHLH139	>AT1G01260.1
	AtbHLH140	>AT5G01310.1
	AtbHLH141	>AT5G38860.1
	AtbHLH142	>AT5G64340.1
	AtbHLH143	>AT5G09460.1
	AtbHLH144	>AT1G29950.1
	AtbHLH145	>AT5G50010.1
	AtbHLH146	>AT4G30180.1
	AtbHLH147	>AT3G17100.1
	AtbHLH148	>AT3G06590.1
	AtbHLH149	>AT1G09250.1
	AtbHLH150	>AT3G05800.1
	AtbHLH151	>AT2G47270.1
	AtbHLH153	>AT1G05710.2
	AtbHLH154	>AT2G31730.1
	AtbHLH155	>AT2G31280.3
	AtbHLH156	>AT2G27230.1
	AtbHLH157	>AT1G64625.1
	AtbHLH158	>AT2G43060.1
	AtbHLH159	>AT4G30410.2
	AtbHLH160	>AT1G71200.1
	AtbHLH161	>AT3G47710.1
	AtbHLH162	>AT4G20970.1
	AtbHLH163	>AT1G26945.1
	AtbHLH164	>AT3G28857.1
	AtbHLH165	>AT2G42870.1
	AtbHLH166	>AT3G58850.1
	AtbHLH167	>AT5G57780.1
	AtbHLH168	>AT3G29370.1
	AtbHLH169	>AT5G39240.1
	AtbHLH170	>AT2G18969.1

## Sheet: TableS2
The analysis of physicochemical properties of PcbHLHs
protein_ids	pI	molecular_weight	length	extinction_coefficient	hydrophilicity
PcbHLH45	6.32939	36087.7	325	11460	-0.947692
PcbHLH85	7.16429	30025.2	266	22460	-0.944361
PcbHLH95	6.37111	26621.4	237	16960	-0.867932
PcbHLH93	6.01563	35749.4	323	12950	-0.866873
PcbHLH140	5.69921	30135.9	274	18450	-0.838686
PcbHLH149	9.19624	38854.4	351	25900	-0.833903
PcbHLH9	5.26866	34510.7	316	28420	-0.827848
PcbHLH156	6.3781	30156.4	265	18450	-0.822642
PcbHLH113	8.9069	65210.5	596	40910	-0.813926
PcbHLH83	9.2551	18891.5	166	12950	-0.801205
PcbHLH52	7.01174	33347	299	14440	-0.799331
PcbHLH101	5.20892	35592.1	322	25440	-0.79472
PcbHLH79	5.88689	36421.1	329	25440	-0.789362
PcbHLH42	5.2038	36599.9	333	24410	-0.777778
PcbHLH91	5.04437	38461.6	355	29910	-0.777746
PcbHLH155	5.5724	36622	332	24410	-0.776506
PcbHLH24	7.97624	29341.6	262	14440	-0.771756
PcbHLH18	6.71441	58104.2	530	27960	-0.764717
PcbHLH69	6.28312	18294	165	13410	-0.75697
PcbHLH89	7.6921	46181.8	421	18910	-0.748456
PcbHLH165	6.06457	28476.5	258	14440	-0.746899
PcbHLH139	9.64474	10339.6	91	1490	-0.743956
PcbHLH134	7.94929	62233.6	572	26930	-0.734965
PcbHLH138	8.783	61455.5	567	32430	-0.733333
PcbHLH108	6.0116	49474.6	452	55920	-0.727212
PcbHLH137	7.78	31190.6	275	11460	-0.722182
PcbHLH29	5.74872	61689.9	566	29910	-0.713781
PcbHLH5	8.24939	27791.2	241	17420	-0.712863
PcbHLH115	6.01075	29826.8	272	18450	-0.711397
PcbHLH94	5.12707	65374.2	579	44350	-0.70829
PcbHLH1	9.13686	24860.1	219	9970	-0.701826
PcbHLH124	7.60298	28336.4	262	14440	-0.69771
PcbHLH12	6.0906	46878	426	57410	-0.692488
PcbHLH7	6.14926	48790.6	443	30940	-0.690293
PcbHLH107	5.85444	26601.4	239	10430	-0.688703
PcbHLH57	5.66522	78107.6	694	67380	-0.688473
PcbHLH92	5.56956	48493.4	440	29910	-0.687273
PcbHLH157	6.01239	36095.7	330	32430	-0.686364
PcbHLH64	8.79776	39059.8	355	18910	-0.684225
PcbHLH88	9.67111	14048.1	119	7450	-0.684034
PcbHLH126	5.02135	38018	343	16960	-0.683382
PcbHLH142	6.60494	39722.2	355	15930	-0.677465
PcbHLH105	6.43908	20633.9	183	4470	-0.671585
PcbHLH109	7.69943	27670.9	251	19480	-0.66494
PcbHLH55	5.43633	44160.4	407	17420	-0.661671
PcbHLH33	5.49255	72203.2	660	74370	-0.660606
PcbHLH150	6.03814	38737.9	348	20970	-0.660345
PcbHLH30	5.95004	61443.9	563	21430	-0.653464
PcbHLH63	5.66079	38515.4	349	22460	-0.645845
PcbHLH21	5.70518	43352.8	399	17420	-0.641103
PcbHLH99	6.0158	39950.4	358	14440	-0.634078
PcbHLH49	10.0033	17345.9	152	11460	-0.632895
PcbHLH121	5.65442	77527.1	719	25900	-0.631989
PcbHLH22	4.71004	40505.7	364	28420	-0.631319
PcbHLH6	5.50943	71209.4	647	78380	-0.629057
PcbHLH81	6.01308	39325.6	352	14440	-0.625
PcbHLH133	6.29466	62208.2	566	28880	-0.622438
PcbHLH135	8.73065	36370.9	342	15930	-0.62193
PcbHLH41	8.53189	31243.1	278	15470	-0.620863
PcbHLH103	5.52636	27019.2	243	19480	-0.61893
PcbHLH13	8.22231	29118.9	262	15470	-0.617557
PcbHLH2	6.10635	20591.8	183	4470	-0.612022
PcbHLH159	5.87814	31582.6	274	26930	-0.610949
PcbHLH32	5.93663	24853.9	221	8480	-0.609502
PcbHLH31	6.03576	60873.1	553	34380	-0.608318
PcbHLH152	6.96422	18125.2	163	11920	-0.607362
PcbHLH76	5.72303	42449.1	379	25440	-0.60686
PcbHLH11	4.90966	46264.3	409	8940	-0.606112
PcbHLH80	5.64033	61215.8	572	23950	-0.605245
PcbHLH145	5.61617	28017	247	14440	-0.604453
PcbHLH118	5.92185	60334.8	546	21430	-0.600549
PcbHLH144	7.74155	27808.1	246	14440	-0.599187
PcbHLH114	9.50298	10413.7	91	1490	-0.598901
PcbHLH98	9.29552	24749	219	15470	-0.59863
PcbHLH37	5.2719	27528	247	24980	-0.595142
PcbHLH40	5.92651	36664.5	334	33920	-0.594611
PcbHLH148	6.72459	30188.6	264	15930	-0.592045
PcbHLH82	8.89279	31957.4	279	18450	-0.591398
PcbHLH160	5.20625	24859.8	216	25440	-0.590741
PcbHLH44	6.22099	49031.3	442	28420	-0.589593
PcbHLH117	7.08688	40144.9	358	24410	-0.58743
PcbHLH153	5.17356	47884.4	421	10430	-0.587173
PcbHLH25	8.69171	52408.8	481	41940	-0.586279
PcbHLH146	5.92088	26454.5	240	8480	-0.582083
PcbHLH112	6.39674	30471.8	273	9970	-0.580952
PcbHLH129	8.42758	51095.3	471	40450	-0.580042
PcbHLH47	6.10635	39022.4	344	28420	-0.579942
PcbHLH77	10.1638	22397.7	196	16960	-0.579592
PcbHLH17	4.78746	78553	700	70820	-0.574143
PcbHLH97	5.56428	24610.8	221	14440	-0.570136
PcbHLH100	5.55507	60118.5	562	29450	-0.569039
PcbHLH38	6.1716	20817.3	184	4470	-0.563043
PcbHLH161	5.63129	28748.4	247	29910	-0.561538
PcbHLH73	5.72462	50731.8	459	28880	-0.56122
PcbHLH104	5.59548	53114.5	484	64400	-0.56095
PcbHLH151	5.32555	52176.5	467	40340	-0.55803
PcbHLH122	6.07532	38724.4	343	28420	-0.555394
PcbHLH143	5.96096	61615.3	563	21430	-0.553996
PcbHLH43	9.02894	10414.8	90	1490	-0.548889
PcbHLH66	5.7864	28771.4	248	27960	-0.544758
PcbHLH119	8.85642	27284.8	239	7450	-0.541423
PcbHLH127	5.42087	33782.3	310	5960	-0.54129
PcbHLH60	8.55317	27231.7	240	7450	-0.54125
PcbHLH46	5.8541	79147.1	740	22920	-0.539054
PcbHLH120	6.39424	28147.3	248	14440	-0.535484
PcbHLH132	5.38637	44064.3	390	18450	-0.530769
PcbHLH130	6.19138	68052.5	618	65890	-0.530744
PcbHLH36	6.32785	53112.8	483	65890	-0.530021
PcbHLH72	5.99313	47713.5	453	13980	-0.529581
PcbHLH26	7.56967	61278.3	549	75400	-0.520583
PcbHLH3	7.75911	52738.7	471	47900	-0.51741
PcbHLH19	5.51386	36808.1	325	31400	-0.516308
PcbHLH54	6.0033	36107.1	328	15470	-0.512195
PcbHLH169	6.23935	23988.8	212	16960	-0.509906
PcbHLH128	10.1773	16199.5	142	7450	-0.509859
PcbHLH147	8.54472	27141.6	241	7450	-0.507469
PcbHLH56	9.4563	51969.4	474	26930	-0.506751
PcbHLH20	4.63973	39432.2	347	14440	-0.502017
PcbHLH131	5.77987	54766	493	50420	-0.49858
PcbHLH65	8.26228	28233.3	247	15930	-0.492713
PcbHLH168	6.53497	23802.6	212	16960	-0.490566
PcbHLH167	7.79766	24109	213	16960	-0.488263
PcbHLH50	6.83707	34974.9	314	21430	-0.484395
PcbHLH27	5.39598	54639.9	491	51910	-0.480448
PcbHLH62	6.60852	28498.9	250	14440	-0.48
PcbHLH61	7.03675	28352.7	251	17420	-0.479681
PcbHLH170	4.97071	35083.9	313	18910	-0.473482
PcbHLH158	5.87109	48015.9	457	15470	-0.473304
PcbHLH84	8.12574	47433.5	422	22460	-0.473223
PcbHLH110	4.772	33776.7	298	16390	-0.468456
PcbHLH71	9.50891	44101.4	395	11460	-0.468101
PcbHLH74	7.6127	40455.5	367	12950	-0.467847
PcbHLH87	4.80656	34988.8	313	17420	-0.461022
PcbHLH35	6.25612	52235.2	465	54890	-0.457849
PcbHLH67	6.47035	28420.1	250	26930	-0.4536
PcbHLH154	7.94181	10287.6	90	1490	-0.438889
PcbHLH28	6.55265	50639.1	444	27390	-0.436486
PcbHLH164	5.37495	22399.1	200	9970	-0.4335
PcbHLH59	6.13022	55412.9	504	40910	-0.432143
PcbHLH34	5.75321	70417.8	634	58900	-0.423502
PcbHLH162	5.38904	25316.6	224	12950	-0.414732
PcbHLH68	5.11189	28250.9	248	18450	-0.411694
PcbHLH96	9.29823	27698.2	249	5960	-0.406426
PcbHLH14	4.62547	33404.1	298	13410	-0.402013
PcbHLH163	5.44145	28125.8	249	22920	-0.400803
PcbHLH53	8.73207	28264.4	253	11460	-0.399605
PcbHLH4	6.08509	69785.4	629	54890	-0.396979
PcbHLH15	6.58851	55122.6	505	40910	-0.381584
PcbHLH75	9.48493	25440.2	229	8480	-0.375109
PcbHLH8	8.54491	37001.9	330	11460	-0.368485
PcbHLH78	8.9998	28794.4	262	22460	-0.362595
PcbHLH23	4.78422	32512.7	307	5960	-0.358306
PcbHLH10	6.24015	25003.1	222	23950	-0.356306
PcbHLH166	8.25893	29456.3	267	12490	-0.355805
PcbHLH123	6.24555	35571.9	332	13980	-0.35512
PcbHLH70	4.81343	54857.9	512	27390	-0.350977
PcbHLH90	6.87243	37352.2	332	12950	-0.342771
PcbHLH111	5.16305	35435.6	324	7450	-0.333951
PcbHLH48	5.89002	35158.3	331	13980	-0.329003
PcbHLH39	7.61616	29106.8	264	8940	-0.319318
PcbHLH136	4.77461	33214.9	303	5960	-0.30396
PcbHLH106	6.91238	24393.7	222	4470	-0.298198
PcbHLH58	5.74139	31693.6	300	13980	-0.284667
PcbHLH16	5.73815	31745.6	300	13980	-0.28
PcbHLH116	9.40099	20444.5	179	4470	-0.258659
PcbHLH102	7.57268	28228.7	258	22460	-0.257364
PcbHLH141	9.42594	20365.5	178	9970	-0.207865
PcbHLH125	6.25828	29027.8	268	6990	-0.195522
PcbHLH51	9.56648	26345.7	236	5960	-0.181356
PcbHLH86	6.65377	23100.4	206	5960	-0.103883

## Sheet: TableS3
The Ka/Ks analysis of PcbHLHs
Seq_1	Seq_2	Ka	Ks	Ka_Ks
Potri.001G062900.1	Potri.003G164500.1	0.173189	0.408034	0.424448
Potri.001G063000.1	#N/A	#N/A	#N/A	#N/A
Potri.001G083500.1	Potri.002G176900.1	0.348541	2.2912	0.152121
Potri.001G103600.1	Potri.002G159400.1	0.380292	2.22524	0.170899
Potri.001G113400.1	Potri.012G132000.1	0.491604	1.29953	0.378294
Potri.001G142200.1	Potri.003G092200.1	0.058213	0.28545	0.203934
Potri.001G191800.1	#N/A	#N/A	#N/A	#N/A
Potri.001G287200.1	Potri.009G081400.1	0.0678002	0.247052	0.274437
Potri.001G294300.1	Potri.002G119200.1	0.392436	2.62495	0.149502
Potri.001G305100.1	Potri.014G025900.1	0.296093	1.51736	0.195137
Potri.001G314400.1	Potri.017G054500.1	0.0763067	0.285678	0.267108
Potri.001G410600.1	Potri.011G033000.1	0.341757	1.54729	0.220875
Potri.001G416600.1	Potri.011G132400.1	0.0928865	0.313117	0.296651
Potri.001G461000.1	Potri.011G157700.1	0.10702	0.296176	0.361339
Potri.002G042000.1	Potri.005G221100.2	0.0791478	0.250144	0.316409
Potri.002G045400.1	Potri.005G217800.1	0.0293749	0.357958	0.0820625
Potri.002G054100.1	Potri.005G208600.1	0.103121	0.381442	0.270344
Potri.002G055400.1	Potri.005G207200.1	0.160143	0.391163	0.409401
Potri.002G101900.1	Potri.005G071100.1	0.379599	1.80195	0.21066
Potri.002G108400.1	#N/A	#N/A	#N/A	#N/A
Potri.002G114700.1	#N/A	#N/A	#N/A	#N/A
Potri.002G119200.1	Potri.009G089000.1	0.364708	1.94768	0.187252
Potri.002G124400.1	Potri.005G139700.1	0.453982	2.16104	0.210076
Potri.002G125000.1	Potri.005G138900.1	0.319595	2.40808	0.132718
Potri.002G143300.1	#N/A	#N/A	#N/A	#N/A
Potri.002G172100.1	Potri.014G099700.1	0.0726785	0.293437	0.24768
Potri.002G176900.1	Potri.003G147300.1	0.369336	2.03885	0.181149
Potri.002G180300.3	#N/A	#N/A	#N/A	#N/A
Potri.002G235400.1	Potri.014G148900.1	0.0883434	0.312789	0.282438
Potri.002G248500.1	#N/A	#N/A	#N/A	#N/A
Potri.002G252800.8	#N/A	#N/A	#N/A	#N/A
Potri.003G074400.1	#N/A	#N/A	#N/A	#N/A
Potri.003G092200.1	#N/A	#N/A	#N/A	#N/A
Potri.003G128000.1	Potri.014G083900.1	0.38842	1.62943	0.238377
Potri.003G147300.1	Potri.014G103700.1	0.364908	1.71049	0.213336
Potri.004G029100.1	Potri.011G129500.1	0.383733	1.55587	0.246636
Potri.004G031800.1	#N/A	#N/A	#N/A	#N/A
Potri.004G044400.1	Potri.011G053400.1	0.0956233	0.226588	0.422014
Potri.004G055700.1	Potri.011G065500.1	0.0915738	0.249307	0.367313
Potri.004G088900.1	Potri.017G126800.1	0.0894203	0.220409	0.405701
Potri.004G099400.1	Potri.012G055700.1	0.390991	1.32767	0.294493
Potri.004G112900.1	Potri.010G137600.1	0.402675	NaN	NaN
Potri.004G128400.1	Potri.017G081300.1	0.0291771	0.254013	0.114864
Potri.004G156000.5	#N/A	#N/A	#N/A	#N/A
Potri.004G168100.1	Potri.009G129600.1	0.0835671	0.345106	0.242149
Potri.005G001800.1	Potri.013G001300.1	0.101446	0.243765	0.416162
Potri.005G039800.1	Potri.013G025900.1	0.0632089	0.297746	0.212291
Potri.005G053500.1	Potri.005G217800.1	0.310532	2.50253	0.124087
Potri.005G060900.1	Potri.007G108000.1	0.70842	3.24097	0.218583
Potri.005G071100.1	#N/A	#N/A	#N/A	#N/A
Potri.005G095400.1	#N/A	#N/A	#N/A	#N/A
Potri.005G113400.1	#N/A	#N/A	#N/A	#N/A
Potri.005G138900.1	Potri.007G044600.1	0.685409	NaN	NaN
Potri.005G139700.1	Potri.014G025800.1	0.429469	1.71523	0.250386
Potri.005G146500.1	#N/A	#N/A	#N/A	#N/A
Potri.005G207200.1	#N/A	#N/A	#N/A	#N/A
Potri.005G208600.1	#N/A	#N/A	#N/A	#N/A
Potri.005G217800.1	Potri.013G041000.1	0.411935	2.10618	0.195584
Potri.005G221100.1	#N/A	#N/A	#N/A	#N/A
Potri.006G037100.1	Potri.016G035400.1	0.0257418	0.229759	0.112038
Potri.006G037200.1	#N/A	#N/A	#N/A	#N/A
Potri.006G037600.1	#N/A	#N/A	#N/A	#N/A
Potri.006G057200.2	#N/A	#N/A	#N/A	#N/A
Potri.006G057600.1	Potri.009G064700.2	0.358774	1.92068	0.186795
Potri.006G074600.1	Potri.018G141500.1	0.179054	0.401419	0.446052
Potri.006G074700.1	#N/A	#N/A	#N/A	#N/A
Potri.006G074800.1	#N/A	#N/A	#N/A	#N/A
Potri.006G074900.1	#N/A	#N/A	#N/A	#N/A
Potri.006G102600.1	Potri.016G120800.1	0.0809679	0.383119	0.211339
Potri.006G135600.1	#N/A	#N/A	#N/A	#N/A
Potri.006G148800.1	#N/A	#N/A	#N/A	#N/A
Potri.006G186600.1	Potri.018G109500.1	0.0636614	0.366424	0.173737
Potri.006G202100.1	Potri.016G068500.1	0.0665899	0.335526	0.198464
Potri.007G009400.1	#N/A	#N/A	#N/A	#N/A
Potri.007G010500.1	#N/A	#N/A	#N/A	#N/A
Potri.007G023600.1	Potri.009G117300.1	0.355589	1.96128	0.181304
Potri.007G097600.1	#N/A	#N/A	#N/A	#N/A
Potri.008G052000.1	Potri.010G208600.1	0.12687	0.298923	0.424422
Potri.008G070800.1	Potri.010G186700.1	0.0427877	0.338008	0.126588
Potri.008G112000.2	#N/A	#N/A	#N/A	#N/A
Potri.008G113200.1	Potri.010G136100.1	0.0561605	0.200847	0.279619
Potri.008G116000.1	Potri.010G130000.1	0.0370446	0.320166	0.115704
Potri.008G161800.2	#N/A	#N/A	#N/A	#N/A
Potri.008G165700.1	Potri.010G072900.1	0.0691976	0.217519	0.318123
Potri.008G189600.1	Potri.010G041500.1	0.16429	0.226711	0.724669
Potri.008G190800.1	Potri.010G040000.1	0.0701505	0.187131	0.374874
Potri.008G202900.1	#N/A	#N/A	#N/A	#N/A
Potri.009G005600.1	#N/A	#N/A	#N/A	#N/A
Potri.009G023800.1	#N/A	#N/A	#N/A	#N/A
Potri.009G064700.1	#N/A	#N/A	#N/A	#N/A
Potri.009G081400.1	#N/A	#N/A	#N/A	#N/A
Potri.009G089000.1	Potri.014G017100.1	0.384197	1.59175	0.241368
Potri.009G117300.1	#N/A	#N/A	#N/A	#N/A
Potri.009G129600.1	#N/A	#N/A	#N/A	#N/A
Potri.009G136300.1	#N/A	#N/A	#N/A	#N/A
Potri.010G040000.1	Potri.015G068100.1	0.259376	2.07157	0.125208
Potri.010G072900.1	#N/A	#N/A	#N/A	#N/A
Potri.010G077000.1	#N/A	#N/A	#N/A	#N/A
Potri.010G130000.1	#N/A	#N/A	#N/A	#N/A
Potri.010G136100.1	#N/A	#N/A	#N/A	#N/A
Potri.010G137600.1	#N/A	#N/A	#N/A	#N/A
Potri.010G186700.1	#N/A	#N/A	#N/A	#N/A
Potri.011G031000.1	#N/A	#N/A	#N/A	#N/A
Potri.011G033000.1	#N/A	#N/A	#N/A	#N/A
Potri.011G053400.1	Potri.013G129800.1	0.386321	1.34812	0.286563
Potri.011G065500.1	Potri.019G089000.1	0.354371	1.62349	0.218278
Potri.011G080000.1	#N/A	#N/A	#N/A	#N/A
Potri.011G129500.1	#N/A	#N/A	#N/A	#N/A
Potri.011G132400.1	#N/A	#N/A	#N/A	#N/A
Potri.011G157700.1	#N/A	#N/A	#N/A	#N/A
Potri.012G031800.1	Potri.015G022300.1	0.0406931	0.257704	0.157906
Potri.012G055700.1	Potri.015G046300.1	0.0884835	0.381149	0.232149
Potri.012G065000.1	#N/A	#N/A	#N/A	#N/A
Potri.012G069500.1	Potri.015G063300.1	0.0597578	0.459004	0.13019
Potri.012G072700.1	Potri.015G068100.1	0.0750939	0.188198	0.399015
Potri.012G079100.1	Potri.015G074500.1	0.0758861	0.322275	0.23547
Potri.012G104900.1	Potri.015G104200.1	0.122046	0.204608	0.596487
Potri.012G106000.1	Potri.015G105200.1	0.033543	0.257685	0.13017
Potri.012G132000.1	Potri.015G134300.1	0.115688	0.256137	0.451664
Potri.012G132100.1	#N/A	#N/A	#N/A	#N/A
Potri.013G001300.1	Potri.014G111400.1	0.500173	1.46955	0.340359
Potri.013G025900.1	#N/A	#N/A	#N/A	#N/A
Potri.013G041000.3	#N/A	#N/A	#N/A	#N/A
Potri.013G107500.1	Potri.019G079900.2	0.0744192	0.378921	0.196397
Potri.013G117600.1	Potri.019G089000.1	0.105054	0.276398	0.380084
Potri.013G129800.1	Potri.019G099300.1	0.132342	0.263357	0.502521
Potri.014G017100.1	#N/A	#N/A	#N/A	#N/A
Potri.014G025800.1	#N/A	#N/A	#N/A	#N/A
Potri.014G027300.1	#N/A	#N/A	#N/A	#N/A
Potri.014G066500.1	#N/A	#N/A	#N/A	#N/A
Potri.014G099700.1	#N/A	#N/A	#N/A	#N/A
Potri.014G103700.1	#N/A	#N/A	#N/A	#N/A
Potri.014G106300.1	#N/A	#N/A	#N/A	#N/A
Potri.014G111400.1	#N/A	#N/A	#N/A	#N/A
Potri.014G148900.1	#N/A	#N/A	#N/A	#N/A
Potri.014G150600.1	#N/A	#N/A	#N/A	#N/A
Potri.015G022300.1	#N/A	#N/A	#N/A	#N/A
Potri.015G046300.1	Potri.017G115300.1	0.434174	1.93904	0.223911
Potri.015G048000.1	#N/A	#N/A	#N/A	#N/A
Potri.015G063300.1	#N/A	#N/A	#N/A	#N/A
Potri.015G068100.1	#N/A	#N/A	#N/A	#N/A
Potri.015G074500.1	#N/A	#N/A	#N/A	#N/A
Potri.015G104200.1	#N/A	#N/A	#N/A	#N/A
Potri.015G105200.1	#N/A	#N/A	#N/A	#N/A
Potri.015G134300.1	#N/A	#N/A	#N/A	#N/A
Potri.015G134400.1	#N/A	#N/A	#N/A	#N/A
Potri.015G142700.1	#N/A	#N/A	#N/A	#N/A
Potri.016G035400.1	#N/A	#N/A	#N/A	#N/A
Potri.016G037300.1	#N/A	#N/A	#N/A	#N/A
Potri.016G050500.1	#N/A	#N/A	#N/A	#N/A
Potri.016G051100.1	#N/A	#N/A	#N/A	#N/A
Potri.016G068500.1	#N/A	#N/A	#N/A	#N/A
Potri.016G120800.1	#N/A	#N/A	#N/A	#N/A
Potri.017G054500.1	#N/A	#N/A	#N/A	#N/A
Potri.017G081300.1	#N/A	#N/A	#N/A	#N/A
Potri.017G101700.1	#N/A	#N/A	#N/A	#N/A
Potri.017G115300.1	#N/A	#N/A	#N/A	#N/A
Potri.017G126800.1	#N/A	#N/A	#N/A	#N/A
Potri.018G109500.1	#N/A	#N/A	#N/A	#N/A
Potri.018G141500.1	#N/A	#N/A	#N/A	#N/A
Potri.018G141600.1	#N/A	#N/A	#N/A	#N/A
Potri.018G141700.1	#N/A	#N/A	#N/A	#N/A
Potri.018G141800.1	#N/A	#N/A	#N/A	#N/A
Potri.019G034700.1	#N/A	#N/A	#N/A	#N/A
Potri.019G079900.2	#N/A	#N/A	#N/A	#N/A
Potri.019G089000.1	#N/A	#N/A	#N/A	#N/A
Potri.019G099300.1	#N/A	#N/A	#N/A	#N/A
Potri.019G099400.1	#N/A	#N/A	#N/A	#N/A
Potri.019G099500.1	#N/A	#N/A	#N/A	#N/A
Potri.T155900.1	#N/A	#N/A	#N/A	#N/A
