# Supplementary material for: Genome-wide identification of bHLH gene family and its response to cadmium stress in Populus × canescens
Source: PeerJ journal article supplement (doi:10.7717/peerj.17410), 2024-05-27
Supplement: tableS4.xls [file tableS4.xls]

## Sheet: qPCR primer
Sequence accession number	Sequence ID	Primer ID	Primer Sequence	Primer Tm	Primer GC	Product Size	Product Tm
Potri.006G037200.1	PcbHLH61	PcbHLH61_1_F	GCCCGTAGAGGAACCCAC	59.417	66.667	102	81.9
Potri.006G037200.1	PcbHLH61	PcbHLH61_1_R	TGTGGCTGAGATGGAGGGA	59.919	57.895	102	81.9
Potri.016G037300.1	PcbHLH148	PcbHLH148_1_F	TGGATGGCCCTTGGAGGA	59.873	61.111	144	84.8
Potri.016G037300.1	PcbHLH148	PcbHLH148_1_R	CCACTGTGGGCCGTGAAT	59.966	61.111	144	84.8
Potri.008G161800.2	PcbHLH82	PcbHLH82_1_F	GCCTGGTGCTCCTGTGTC	60.359	66.667	137	84.1
Potri.008G161800.2	PcbHLH82	PcbHLH82_1_R	TCCCTTGCCCTTTGCCAG	59.882	61.111	137	84.1
Potri.010G077000.1	PcbHLH98	PcbHLH98_1_F	TTTGAGCTTCCCGGCTGG	59.966	61.111	145	85
Potri.010G077000.1	PcbHLH98	PcbHLH98_1_R	AGCCCCAGGTCTGCGTAT	60.366	61.111	145	85
Potri.001G305100.1	PcbHLH10	PcbHLH10_1_F	CGGGTTCGGGCTCACATA	59.103	61.111	109	84.4
Potri.001G305100.1	PcbHLH10	PcbHLH10_1_R	TCGCCTACGCCTCCCTTA	59.724	61.111	109	84.4
Potri.007G097600.1	PcbHLH96	PcbHLH96_1_F	AATGGCGGGCTCTTCACC	60.045	61.111	137	86.5
Potri.007G097600.1	PcbHLH96	PcbHLH96_1_R	TGCTTCCTCCGATTGCGT	59.337	55.556	137	86.5
Potri.002G101900.1	PcbHLH19	PcbHLH19_1_F	AAGGTCCGCCTGTTTCCG	59.968	61.111	136	84.2
Potri.002G101900.1	PcbHLH19	PcbHLH19_1_R	TCGTAGTCCCAGGCTCCC	60.043	66.667	136	84.2
Potri.005G071100.1	PcbHLH50	PcbHLH50_1_F	CGGCGAAAGAGACAGCGT	60.431	61.111	143	82.6
Potri.005G071100.1	PcbHLH50	PcbHLH50_1_R	GAGGGAGGCATCATGGATCG	60.037	60	143	82.6
Potri.013G025900.1	PcbHLH122	PcbHLH122_1_F	CCGCCGGCAAGGATGAAA	60.75	61.111	112	83.2
Potri.013G025900.1	PcbHLH122	PcbHLH122_1_R	TTCGGCCGCCTTTTCGAT	60.047	55.556	112	83.2
Potri.005G039800.1	PcbHLH47	PcbHLH47_1_F	ACCTCTACGGCTCACCCT	59.228	61.111	119	79.6
Potri.005G039800.1	PcbHLH47	PcbHLH47_1_R	TGCAGCCATGGCCCATTT	60.285	55.556	119	79.6
Potri.019G099400.1	PcbHLH168	PcbHLH168_1_F	GCACAACCCCTGCCTGAT	59.964	61.111	82	79.6
Potri.019G099400.1	PcbHLH168	PcbHLH168_1_R	TCTCCCTGGCTTTCTCCAAC	59.307	55	82	79.6
Potri.019G099300.1	PcbHLH167	PcbHLH167_1_F	CACAGCCCCTGCCTGATC	60.124	66.667	80	79.4
Potri.019G099300.1	PcbHLH167	PcbHLH167_1_R	TTCCCTGGCTTTCTCCAACT	58.851	50	80	79.4
Potri.019G099500.1	PcbHLH169	PcbHLH169_1_F	CACAGCCCCTGCCTGATC	60.124	66.667	80	79.4
Potri.019G099500.1	PcbHLH169	PcbHLH169_1_R	TTCCCTGGCTTTCTCCAACT	58.851	50	80	79.4
Potri.013G129800.1	PcbHLH162	PcbHLH162_1_F	AGGAACCACAGCCACTGC	59.886	61.111	97	80.9
Potri.013G129800.1	PcbHLH162	PcbHLH162_1_R	GCTTCTTTCTTCTCCCTGGCT	59.996	52.381	97	80.9
Potri.019G034700.1	PcbHLH164	PcbHLH164_1_F	GCATTCATGACCTCCGTCCA	60.108	55	148	79.9
Potri.019G034700.1	PcbHLH164	PcbHLH164_1_R	TGCAACCATGAATCCCCTGG	60.325	55	148	79.9
